# Supplementary material for: Red Algal Bromophenols as Glucose 6-Phosphate Dehydrogenase Inhibitors
Source: MDPI journal article supplement (doi:10.3390/md11104050), 2013-10-22
Supplement: s2 [file s2]

marinedrugs-11-04050-s001.mol
  corina  11211302183D 1   1.00000     0.00000 
CORINA 3.49 0023  12.04.2013
 12 12  0  0  0  0  0  0  0  0999 V2000
   -0.0166    1.3727    0.0096 C   0  0  0  0  0  0  0  0  0  0  0  0
    0.0021   -0.0041    0.0020 C   0  0  0  0  0  0  0  0  0  0  0  0
    1.2149   -0.6855   -0.0132 C   0  0  0  0  0  0  0  0  0  0  0  0
    2.4142    0.0196   -0.0209 C   0  0  0  0  0  0  0  0  0  0  0  0
    2.4060    1.3964   -0.0130 C   0  0  0  0  0  0  0  0  0  0  0  0
    1.1878    2.0869    0.0019 C   0  0  0  0  0  0  0  0  0  0  0  0
    1.1735    3.5554    0.0104 C   0  0  0  0  0  0  0  0  0  0  0  0
    0.2330    4.0862    0.0219 H   0  0  0  0  0  0  0  0  0  0  0  0
    2.2180    4.1722    0.0046 O   0  0  0  0  0  0  0  0  0  0  0  0
   -1.6234   -0.9702    0.0130 Br  0  0  0  0  0  0  0  0  0  0  0  0
    1.2281   -2.0424   -0.0202 O   0  0  0  0  0  0  0  0  0  0  0  0
    4.0582   -0.9145   -0.0416 Br  0  0  0  0  0  0  0  0  0  0  0  0
  1  2  2  0      
  2  3  1  0      
  3  4  2  0      
  4  5  1  0      
  5  6  2  0      
  6  1  1  0      
  6  7  1  0      
  7  8  1  0      
  7  9  2  0      
  2 10  1  0      
  3 11  1  0      
  4 12  1  0      
M  END
$$$$
