# Supplementary material for: Red Algal Bromophenols as Glucose 6-Phosphate Dehydrogenase Inhibitors
Source: MDPI journal article supplement (doi:10.3390/md11104050), 2013-10-22
Supplement: s4 [file s4]

marinedrugs-11-04050-s002.mol
  corina  11211302193D 1   1.00000     0.00000 
CORINA 3.49 0023  12.04.2013
 11 11  0  0  0  0  0  0  0  0999 V2000
   -0.0167    1.3789    0.0096 C   0  0  0  0  0  0  0  0  0  0  0  0
    0.0021   -0.0041    0.0020 C   0  0  0  0  0  0  0  0  0  0  0  0
    1.2122   -0.6805   -0.0131 C   0  0  0  0  0  0  0  0  0  0  0  0
    2.4053    0.0349   -0.0207 C   0  0  0  0  0  0  0  0  0  0  0  0
    2.3791    1.4205   -0.0130 C   0  0  0  0  0  0  0  0  0  0  0  0
    1.1694    2.0892    0.0021 C   0  0  0  0  0  0  0  0  0  0  0  0
    1.1434    3.5960    0.0100 C   0  0  0  0  0  0  0  0  0  0  0  0
   -1.6224   -0.9720    0.0129 Br  0  0  0  0  0  0  0  0  0  0  0  0
    1.2328   -2.0405   -0.0202 O   0  0  0  0  0  0  0  0  0  0  0  0
    3.5948   -0.6241   -0.0351 O   0  0  0  0  0  0  0  0  0  0  0  0
    1.1221    4.0790   -1.3348 O   0  0  0  0  0  0  0  0  0  0  0  0
  1  2  2  0      
  2  3  1  0      
  3  4  2  0      
  4  5  1  0      
  5  6  2  0      
  6  1  1  0      
  6  7  1  0      
  2  8  1  0      
  3  9  1  0      
  4 10  1  0      
  7 11  1  0      
M  END
$$$$
