# Supplementary material for: Red Algal Bromophenols as Glucose 6-Phosphate Dehydrogenase Inhibitors
Source: MDPI journal article supplement (doi:10.3390/md11104050), 2013-10-22
Supplement: s5 [file s5]

marinedrugs-11-04050-s002.mol
  ChemDraw11081308372D

 11 11  0  0  0  0  0  0  0  0999 V2000
   -0.7145    0.2062    0.0000 C   0  0  0  0  0  0  0  0  0  0  0  0
   -0.7145   -0.6188    0.0000 C   0  0  0  0  0  0  0  0  0  0  0  0
    0.0000   -1.0313    0.0000 C   0  0  0  0  0  0  0  0  0  0  0  0
    0.7145   -0.6188    0.0000 C   0  0  0  0  0  0  0  0  0  0  0  0
    0.7145    0.2062    0.0000 C   0  0  0  0  0  0  0  0  0  0  0  0
    0.0000    0.6188    0.0000 C   0  0  0  0  0  0  0  0  0  0  0  0
    0.0000    1.4438    0.0000 C   0  0  0  0  0  0  0  0  0  0  0  0
   -1.4289   -1.0313    0.0000 Br  0  0  0  0  0  0  0  0  0  0  0  0
    0.0000   -1.8563    0.0000 O   0  0  0  0  0  0  0  0  0  0  0  0
    1.4289   -1.0313    0.0000 O   0  0  0  0  0  0  0  0  0  0  0  0
    0.7145    1.8563    0.0000 O   0  0  0  0  0  0  0  0  0  0  0  0
  1  2  2  0      
  2  3  1  0      
  3  4  2  0      
  4  5  1  0      
  5  6  2  0      
  6  1  1  0      
  6  7  1  0      
  2  8  1  0      
  3  9  1  0      
  4 10  1  0      
  7 11  1  0      
M  END
