# Supplementary material for: Red Algal Bromophenols as Glucose 6-Phosphate Dehydrogenase Inhibitors
Source: MDPI journal article supplement (doi:10.3390/md11104050), 2013-10-22
Supplement: s8 [file s8]

marinedrugs-11-04050-s004.mol
  corina  11211302193D 1   1.00000     0.00000 
CORINA 3.49 0023  12.04.2013
 22 23  0  0  0  0  0  0  0  0999 V2000
    0.8811   -0.0638    1.1590 C   0  0  0  0  0  0  0  0  0  0  0  0
    0.1976   -0.3023   -0.0229 C   0  0  0  0  0  0  0  0  0  0  0  0
    0.6442    0.2716   -1.2094 C   0  0  0  0  0  0  0  0  0  0  0  0
    1.7701    1.0789   -1.2047 C   0  0  0  0  0  0  0  0  0  0  0  0
    2.4486    1.3132   -0.0228 C   0  0  0  0  0  0  0  0  0  0  0  0
    2.0054    0.7438    1.1569 C   0  0  0  0  0  0  0  0  0  0  0  0
    2.9373    1.0685    2.7700 Br  0  0  0  0  0  0  0  0  0  0  0  0
   -0.9070   -1.0958   -0.0232 O   0  0  0  0  0  0  0  0  0  0  0  0
   -0.0231    0.0400   -2.3717 O   0  0  0  0  0  0  0  0  0  0  0  0
    2.4644    4.8915   -0.9418 Br  0  0  0  0  0  0  0  0  0  0  0  0
    3.5541    3.7454   -1.9786 C   0  0  0  0  0  0  0  0  0  0  0  0
    4.0272    2.5639   -1.4370 C   0  0  0  0  0  0  0  0  0  0  0  0
    3.6733    2.1913   -0.0203 C   0  0  0  0  0  0  0  0  0  0  0  0
    3.8744    4.0865   -3.2837 C   0  0  0  0  0  0  0  0  0  0  0  0
    4.6759    3.2406   -4.0436 C   0  0  0  0  0  0  0  0  0  0  0  0
    5.1508    2.0609   -3.4929 C   0  0  0  0  0  0  0  0  0  0  0  0
    4.8237    1.7238   -2.1927 C   0  0  0  0  0  0  0  0  0  0  0  0
    0.2736   -0.8352    2.7751 Br  0  0  0  0  0  0  0  0  0  0  0  0
    5.3412    0.4404   -1.5959 C   0  0  0  0  0  0  0  0  0  0  0  0
    6.1390   -0.2466   -2.5622 O   0  0  0  0  0  0  0  0  0  0  0  0
    4.9925    3.5705   -5.3244 O   0  0  0  0  0  0  0  0  0  0  0  0
    3.4056    5.2451   -3.8200 O   0  0  0  0  0  0  0  0  0  0  0  0
  1  2  2  0      
  2  3  1  0      
  3  4  2  0      
  4  5  1  0      
  5  6  2  0      
  6  1  1  0      
  6  7  1  0      
  2  8  1  0      
  3  9  1  0      
 10 11  1  0      
 11 12  2  0      
 12 13  1  0      
 13  5  1  0      
 11 14  1  0      
 14 15  2  0      
 15 16  1  0      
 16 17  2  0      
 17 12  1  0      
  1 18  1  0      
 17 19  1  0      
 19 20  1  0      
 15 21  1  0      
 14 22  1  0      
M  END
$$$$
