# Supplementary material for: Red Algal Bromophenols as Glucose 6-Phosphate Dehydrogenase Inhibitors
Source: MDPI journal article supplement (doi:10.3390/md11104050), 2013-10-22
Supplement: s9 [file s9]

marinedrugs-11-04050-s004.mol
  ChemDraw11081308372D

 22 23  0  0  0  0  0  0  0  0999 V2000
   -2.1434    0.2062    0.0000 C   0  0  0  0  0  0  0  0  0  0  0  0
   -2.1434   -0.6188    0.0000 C   0  0  0  0  0  0  0  0  0  0  0  0
   -1.4289   -1.0313    0.0000 C   0  0  0  0  0  0  0  0  0  0  0  0
   -0.7145   -0.6188    0.0000 C   0  0  0  0  0  0  0  0  0  0  0  0
   -0.7145    0.2062    0.0000 C   0  0  0  0  0  0  0  0  0  0  0  0
   -1.4289    0.6188    0.0000 C   0  0  0  0  0  0  0  0  0  0  0  0
   -1.4289    1.4438    0.0000 Br  0  0  0  0  0  0  0  0  0  0  0  0
   -2.8579   -1.0313    0.0000 O   0  0  0  0  0  0  0  0  0  0  0  0
   -1.4289   -1.8563    0.0000 O   0  0  0  0  0  0  0  0  0  0  0  0
    0.0000   -1.0313    0.0000 Br  0  0  0  0  0  0  0  0  0  0  0  0
    0.7145   -0.6188    0.0000 C   0  0  0  0  0  0  0  0  0  0  0  0
    0.7145    0.2062    0.0000 C   0  0  0  0  0  0  0  0  0  0  0  0
    0.0000    0.6188    0.0000 C   0  0  0  0  0  0  0  0  0  0  0  0
    1.4289   -1.0313    0.0000 C   0  0  0  0  0  0  0  0  0  0  0  0
    2.1434   -0.6188    0.0000 C   0  0  0  0  0  0  0  0  0  0  0  0
    2.1434    0.2062    0.0000 C   0  0  0  0  0  0  0  0  0  0  0  0
    1.4289    0.6188    0.0000 C   0  0  0  0  0  0  0  0  0  0  0  0
   -2.8579    0.6188    0.0000 Br  0  0  0  0  0  0  0  0  0  0  0  0
    1.4289    1.4438    0.0000 C   0  0  0  0  0  0  0  0  0  0  0  0
    2.1434    1.8563    0.0000 O   0  0  0  0  0  0  0  0  0  0  0  0
    2.8579   -1.0313    0.0000 O   0  0  0  0  0  0  0  0  0  0  0  0
    1.4289   -1.8563    0.0000 O   0  0  0  0  0  0  0  0  0  0  0  0
  1  2  2  0      
  2  3  1  0      
  3  4  2  0      
  4  5  1  0      
  5  6  2  0      
  6  1  1  0      
  6  7  1  0      
  2  8  1  0      
  3  9  1  0      
 10 11  1  0      
 11 12  2  0      
 12 13  1  0      
 13  5  1  0      
 11 14  1  0      
 14 15  2  0      
 15 16  1  0      
 16 17  2  0      
 17 12  1  0      
  1 18  1  0      
 17 19  1  0      
 19 20  1  0      
 15 21  1  0      
 14 22  1  0      
M  END
