# Supplementary material for: Red Algal Bromophenols as Glucose 6-Phosphate Dehydrogenase Inhibitors
Source: MDPI journal article supplement (doi:10.3390/md11104050), 2013-10-22
Supplement: s10 [file s10]

marinedrugs-11-04050-s005.mol
  corina  11211302203D 1   1.00000     0.00000 
CORINA 3.49 0023  12.04.2013
 23 24  0  0  0  0  0  0  0  0999 V2000
   -0.0167    1.3819    0.0096 C   0  0  0  0  0  0  0  0  0  0  0  0
    0.0021   -0.0041    0.0020 C   0  0  0  0  0  0  0  0  0  0  0  0
    1.2180   -0.6803   -0.0132 C   0  0  0  0  0  0  0  0  0  0  0  0
    2.4052    0.0341   -0.0207 C   0  0  0  0  0  0  0  0  0  0  0  0
    2.3808    1.4165   -0.0131 C   0  0  0  0  0  0  0  0  0  0  0  0
    1.1727    2.0897    0.0021 C   0  0  0  0  0  0  0  0  0  0  0  0
    1.1460    3.9805    0.0125 Br  0  0  0  0  0  0  0  0  0  0  0  0
   -1.1656   -0.7015    0.0099 O   0  0  0  0  0  0  0  0  0  0  0  0
    1.2412   -2.0402   -0.0203 O   0  0  0  0  0  0  0  0  0  0  0  0
   -1.6668    2.3054    0.0225 Br  0  0  0  0  0  0  0  0  0  0  0  0
    4.7745    1.2807   -0.0357 O   0  0  0  0  0  0  0  0  0  0  0  0
    3.6733    2.1913   -0.0207 C   0  0  0  0  0  0  0  0  0  0  0  0
    6.7972   -0.4730   -0.0637 C   0  0  0  0  0  0  0  0  0  0  0  0
    7.1361    0.8674   -0.0596 C   0  0  0  0  0  0  0  0  0  0  0  0
    6.0543    1.9164   -0.0440 C   0  0  0  0  0  0  0  0  0  0  0  0
    7.7903   -1.4391   -0.0780 C   0  0  0  0  0  0  0  0  0  0  0  0
    9.1284   -1.0578   -0.0882 C   0  0  0  0  0  0  0  0  0  0  0  0
    9.4627    0.2874   -0.0836 C   0  0  0  0  0  0  0  0  0  0  0  0
    8.4659    1.2476   -0.0693 C   0  0  0  0  0  0  0  0  0  0  0  0
    8.9229    3.0825   -0.0636 Br  0  0  0  0  0  0  0  0  0  0  0  0
   11.2798    0.8106   -0.0968 Br  0  0  0  0  0  0  0  0  0  0  0  0
   10.1063   -2.0030   -0.1018 O   0  0  0  0  0  0  0  0  0  0  0  0
    7.4577   -2.7579   -0.0815 O   0  0  0  0  0  0  0  0  0  0  0  0
  1  2  2  0      
  2  3  1  0      
  3  4  2  0      
  4  5  1  0      
  5  6  2  0      
  6  1  1  0      
  6  7  1  0      
  2  8  1  0      
  3  9  1  0      
  1 10  1  0      
 11 12  1  0      
 12  5  1  0      
 13 14  2  0      
 14 15  1  0      
 15 11  1  0      
 13 16  1  0      
 16 17  2  0      
 17 18  1  0      
 18 19  2  0      
 19 14  1  0      
 19 20  1  0      
 18 21  1  0      
 17 22  1  0      
 16 23  1  0      
M  END
$$$$
