# Supplementary material for: Red Algal Bromophenols as Glucose 6-Phosphate Dehydrogenase Inhibitors
Source: MDPI journal article supplement (doi:10.3390/md11104050), 2013-10-22
Supplement: s11 [file s11]

marinedrugs-11-04050-s005.mol
  ChemDraw11081308382D

 23 24  0  0  0  0  0  0  0  0999 V2000
   -2.8579    0.4125    0.0000 C   0  0  0  0  0  0  0  0  0  0  0  0
   -2.8579   -0.4125    0.0000 C   0  0  0  0  0  0  0  0  0  0  0  0
   -2.1434   -0.8250    0.0000 C   0  0  0  0  0  0  0  0  0  0  0  0
   -1.4289   -0.4125    0.0000 C   0  0  0  0  0  0  0  0  0  0  0  0
   -1.4289    0.4125    0.0000 C   0  0  0  0  0  0  0  0  0  0  0  0
   -2.1434    0.8250    0.0000 C   0  0  0  0  0  0  0  0  0  0  0  0
   -2.1434    1.6500    0.0000 Br  0  0  0  0  0  0  0  0  0  0  0  0
   -3.5724   -0.8250    0.0000 O   0  0  0  0  0  0  0  0  0  0  0  0
   -2.1434   -1.6500    0.0000 O   0  0  0  0  0  0  0  0  0  0  0  0
   -3.5724    0.8250    0.0000 Br  0  0  0  0  0  0  0  0  0  0  0  0
    0.0000    0.4125    0.0000 O   0  0  0  0  0  0  0  0  0  0  0  0
   -0.7145    0.8250    0.0000 C   0  0  0  0  0  0  0  0  0  0  0  0
    1.4289   -0.4125    0.0000 C   0  0  0  0  0  0  0  0  0  0  0  0
    1.4289    0.4125    0.0000 C   0  0  0  0  0  0  0  0  0  0  0  0
    0.7145    0.8250    0.0000 C   0  0  0  0  0  0  0  0  0  0  0  0
    2.1434   -0.8250    0.0000 C   0  0  0  0  0  0  0  0  0  0  0  0
    2.8579   -0.4125    0.0000 C   0  0  0  0  0  0  0  0  0  0  0  0
    2.8579    0.4125    0.0000 C   0  0  0  0  0  0  0  0  0  0  0  0
    2.1434    0.8250    0.0000 C   0  0  0  0  0  0  0  0  0  0  0  0
    2.1434    1.6500    0.0000 Br  0  0  0  0  0  0  0  0  0  0  0  0
    3.5724    0.8250    0.0000 Br  0  0  0  0  0  0  0  0  0  0  0  0
    3.5724   -0.8250    0.0000 O   0  0  0  0  0  0  0  0  0  0  0  0
    2.1434   -1.6500    0.0000 O   0  0  0  0  0  0  0  0  0  0  0  0
  1  2  2  0      
  2  3  1  0      
  3  4  2  0      
  4  5  1  0      
  5  6  2  0      
  6  1  1  0      
  6  7  1  0      
  2  8  1  0      
  3  9  1  0      
  1 10  1  0      
 11 12  1  0      
 12  5  1  0      
 13 14  2  0      
 14 15  1  0      
 15 11  1  0      
 13 16  1  0      
 16 17  2  0      
 17 18  1  0      
 18 19  2  0      
 19 14  1  0      
 19 20  1  0      
 18 21  1  0      
 17 22  1  0      
 16 23  1  0      
M  END
